# Supplementary material for: Does silvoagropecuary landscape fragmentation affect the genetic diversity of the sigmodontine rodent Oligoryzomys longicaudatus?
Source: PubMed Central journal article supplement (PMC5624292; doi:10.7717/peerj.3842), 2017-09-29
Supplement: peerj-05-3842-s001.pdf [file peerj-05-3842-s001.pdf]

Criteria for delimitation of patch areas.

| Patch | Criteria*                                                                                 | Matrix                                      |
|-------|-------------------------------------------------------------------------------------------|---------------------------------------------|
| FR1   | Delimited by forestry paths at its upper, left and bottom, and change of vegetation.      | Plantation forestry Grassland and shrubland |
| FR2   | Delimited by change of vegetation.                                                        | Plantation forestry                         |
| FR3   | Delimited by forestry paths at its left and right sides, and change of vegetation.        | Plantation forestry                         |
| FR4   | Delimited by forestry paths at all its sides.                                             | Plantation forestry                         |
| FR5   | Delimited by forestry paths at its upper, left and right sides, and change of vegetation. | Plantation forestry Grassland and shrubland |

\*Criteria were designed visualizing the patches in Google Earth Pro v 7.1 (<http://www.google.com/earth/>) and based on Soil Use Cover data of the Chilean National Environmental Information System (<http://ide.mma.gob.cl/>).
