# Supplementary material for: Does silvoagropecuary landscape fragmentation affect the genetic diversity of the sigmodontine rodent Oligoryzomys longicaudatus?
Source: PubMed Central journal article supplement (PMC5624292; doi:10.7717/peerj.3842), 2017-09-29
Supplement: peerj-05-3842-s002.pdf [file peerj-05-3842-s002.pdf]

Sampling site, patch name, coordinates of specimens, Genbank accession number and voucher number of each specimen used in this study.

| Patch | Latitude    | Longitude   | Accession | Voucher  |
|-------|-------------|-------------|-----------|----------|
| FR1   | -39.4920278 | -72.5456111 | KY211763  | NK142648 |
| FR1   | -39.4920278 | -72.5456111 | KY211764  | NK142818 |
| FR1   | -39.4920278 | -72.5456111 | KY211765  | NK142824 |
| FR1   | -39.4920278 | -72.5456111 | KY211766  | NK142830 |
| FR1   | -39.4920278 | -72.5456111 | KY211783  | NK142630 |
| FR1   | -39.4920278 | -72.5456111 | KY211784  | NK142631 |
| FR1   | -39.4920278 | -72.5456111 | KY211785  | NK142635 |
| FR1   | -39.4920278 | -72.5456111 | KY211786  | NK142636 |
| FR1   | -39.4920278 | -72.5456111 | KY211787  | NK142645 |
| FR1   | -39.4920278 | -72.5456111 | KY211788  | NK142813 |
| FR1   | -39.4920278 | -72.5456111 | KY211799  | NK142637 |
| FR1   | -39.4920278 | -72.5456111 | KY211800  | NK142629 |
| FR2   | -39.4902778 | -72.5465833 | KY211801  | NK142876 |
| FR2   | -39.4902778 | -72.5465833 | KY211802  | NK142855 |
| FR2   | -39.4902778 | -72.5465833 | KY211803  | NK142859 |
| FR2   | -39.4902778 | -72.5465833 | KY211804  | NK142874 |
| FR2   | -39.4902778 | -72.5465833 | KY211805  | NK142863 |
| FR2   | -39.4902778 | -72.5465833 | KY211806  | NK142867 |
| FR2   | -39.4902778 | -72.5465833 | KY211807  | NK142838 |
| FR2   | -39.4902778 | -72.5465833 | KY211808  | NK142848 |
| FR2   | -39.4902778 | -72.5465833 | KY211809  | NK142851 |
| FR2   | -39.4902778 | -72.5465833 | KY211810  | NK142853 |
| FR2   | -39.4902778 | -72.5465833 | KY211811  | NK142860 |
| FR2   | -39.4902778 | -72.5465833 | KY211812  | NK142865 |

|     |             |             |          |          |
|-----|-------------|-------------|----------|----------|
| FR2 | -39.4902778 | -72.5465833 | KY211813 | NK142875 |
| FR2 | -39.4902778 | -72.5465833 | KY211814 | NK142880 |
| FR2 | -39.4902778 | -72.5465833 | KY211815 | NK142885 |
| FR2 | -39.4902778 | -72.5465833 | KY211816 | NK142887 |
| FR2 | -39.4902778 | -72.5465833 | KY211817 | NK142883 |
| FR2 | -39.4902778 | -72.5465833 | KY211818 | NK142886 |
| FR3 | -39.4862222 | -72.5290278 | KY211820 | NK142667 |
| FR3 | -39.4862222 | -72.5290278 | KY211821 | NK142668 |
| FR3 | -39.4862222 | -72.5290278 | KY211822 | NK142947 |
| FR3 | -39.4862222 | -72.5290278 | KY211823 | NK142659 |
| FR3 | -39.4862222 | -72.5290278 | KY211824 | NK142660 |
| FR3 | -39.4862222 | -72.5290278 | KY211825 | NK142677 |
| FR3 | -39.4862222 | -72.5290278 | KY211826 | NK142955 |
| FR3 | -39.4862222 | -72.5290278 | KY211827 | NK142943 |
| FR3 | -39.4862222 | -72.5290278 | KY211828 | NK142957 |
| FR4 | -39.4878889 | -72.5265278 | KY211829 | NK142690 |
| FR4 | -39.4878889 | -72.5265278 | KY211830 | NK142691 |
| FR4 | -39.4878889 | -72.5265278 | KY211831 | NK142694 |
| FR4 | -39.4878889 | -72.5265278 | KY211832 | NK142703 |
| FR4 | -39.4878889 | -72.5265278 | KY211833 | NK142710 |
| FR4 | -39.4878889 | -72.5265278 | KY211834 | NK142685 |
| FR4 | -39.4878889 | -72.5265278 | KY211835 | NK142687 |
| FR4 | -39.4878889 | -72.5265278 | KY211836 | NK142702 |
| FR4 | -39.4878889 | -72.5265278 | KY211837 | NK142704 |
| FR4 | -39.4878889 | -72.5265278 | KY211838 | NK160034 |
| FR4 | -39.4878889 | -72.5265278 | KY211839 | NK142682 |
| FR4 | -39.4878889 | -72.5265278 | KY211840 | NK142688 |

|     |             |             |          |          |
|-----|-------------|-------------|----------|----------|
| FR4 | -39.4878889 | -72.5265278 | KY211841 | NK142689 |
| FR4 | -39.4878889 | -72.5265278 | KY211842 | NK142692 |
| FR4 | -39.4878889 | -72.5265278 | KY211843 | NK142698 |
| FR4 | -39.4878889 | -72.5265278 | KY211844 | NK142700 |
| FR4 | -39.4878889 | -72.5265278 | KY211845 | NK142701 |
| FR4 | -39.4878889 | -72.5265278 | KY211846 | NK142705 |
| FR4 | -39.4878889 | -72.5265278 | KY211847 | NK142707 |
| FR4 | -39.4878889 | -72.5265278 | KY211848 | NK142708 |
| FR4 | -39.4878889 | -72.5265278 | KY211849 | NK142709 |
| FR4 | -39.4878889 | -72.5265278 | KY211850 | NK142716 |
| FR4 | -39.4878889 | -72.5265278 | KY211851 | NK142719 |
| FR4 | -39.4878889 | -72.5265278 | KY211852 | NK160047 |
| FR5 | -39.4909167 | -72.5390278 | KY211853 | NK142731 |
| FR5 | -39.4909167 | -72.5390278 | KY211854 | NK142741 |
| FR5 | -39.4909167 | -72.5390278 | KY211855 | NK142754 |
| FR5 | -39.4909167 | -72.5390278 | KY211856 | NK142722 |
| FR5 | -39.4909167 | -72.5390278 | KY211857 | NK142725 |
| FR5 | -39.4909167 | -72.5390278 | KY211858 | NK142726 |
| FR5 | -39.4909167 | -72.5390278 | KY211859 | NK142727 |
| FR5 | -39.4909167 | -72.5390278 | KY211860 | NK142736 |
| FR5 | -39.4909167 | -72.5390278 | KY211861 | NK142760 |
| FR5 | -39.4909167 | -72.5390278 | KY211862 | NK142764 |
